# Supplementary material for: Use of aerial thermography to reduce mortality of roe deer fawns before harvest
Source: PeerJ. 2019 May 10;7:e6923. doi: 10.7717/peerj.6923 (PMC6512893; doi:10.7717/peerj.6923)
Supplement: Data S1 [file peerj-07-6923-s001.xlsx]

## Sheet: List1
	acreage of the field		Flight duration
	4.1		8.2
	9.6		15.1
	7.7		13.7
	13.2		22.1
	9.6		9.4
	7.3		14.9
	7.7		13.7
	4		8.2
	24.3		35.3
	7.2		11.9
	13.8		26.4
	8.4		16.8
	13.2		25.5
